# Supplementary material for: Carbon nanospheres derived from Lablab purpureus for high performance supercapacitor electrodes: a green approach
Source: Royal Society of Chemistry journal article supplement (doi:10.1039/c7dt02392h), 2017-01-01
Supplement: c7dt02392h1.pdf [file c7dt02392h1.pdf]

## Carbon nanospheres derived from Lablab Purpureus as a high performance supercapacitor electrode: Green approach

Gomaa A. M. Ali, Divyashree A, Supriya S, Kwok Feng Chong, Anita S. Ethiraj, M V Reddy, H. Algarni and Gurumurthy Hegde

### Electronic supplementary information (ESI)

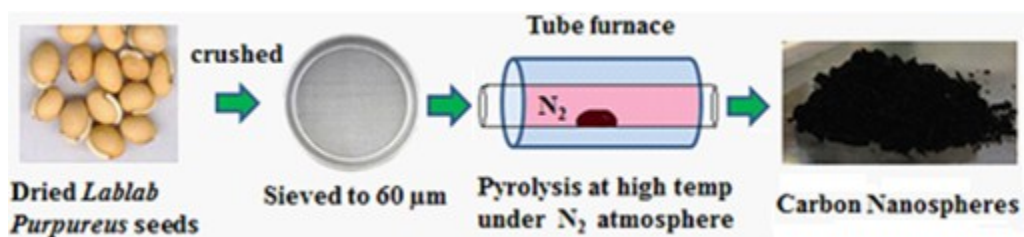

Figure S1: Schematic illustration of synthesis of carbon nanospheres from Lablab Purpureus seeds.

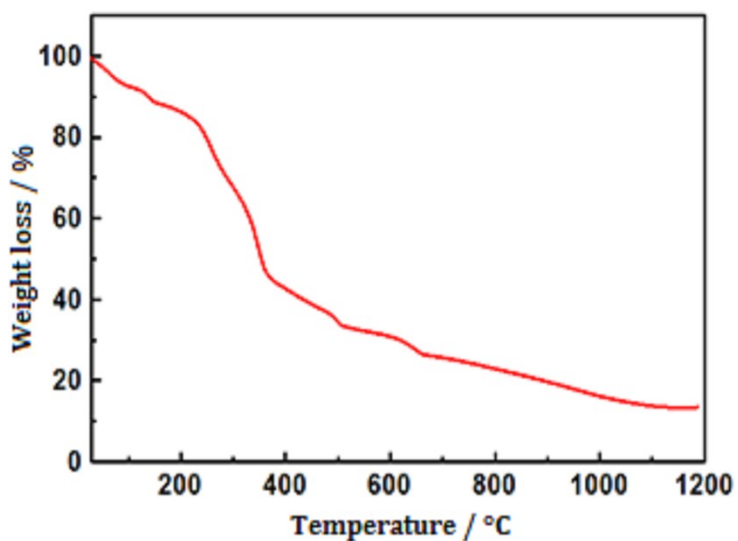

Figure S2: TGA curve of raw Lablab Purpureus seeds under N<sub>2</sub> atmosphere.

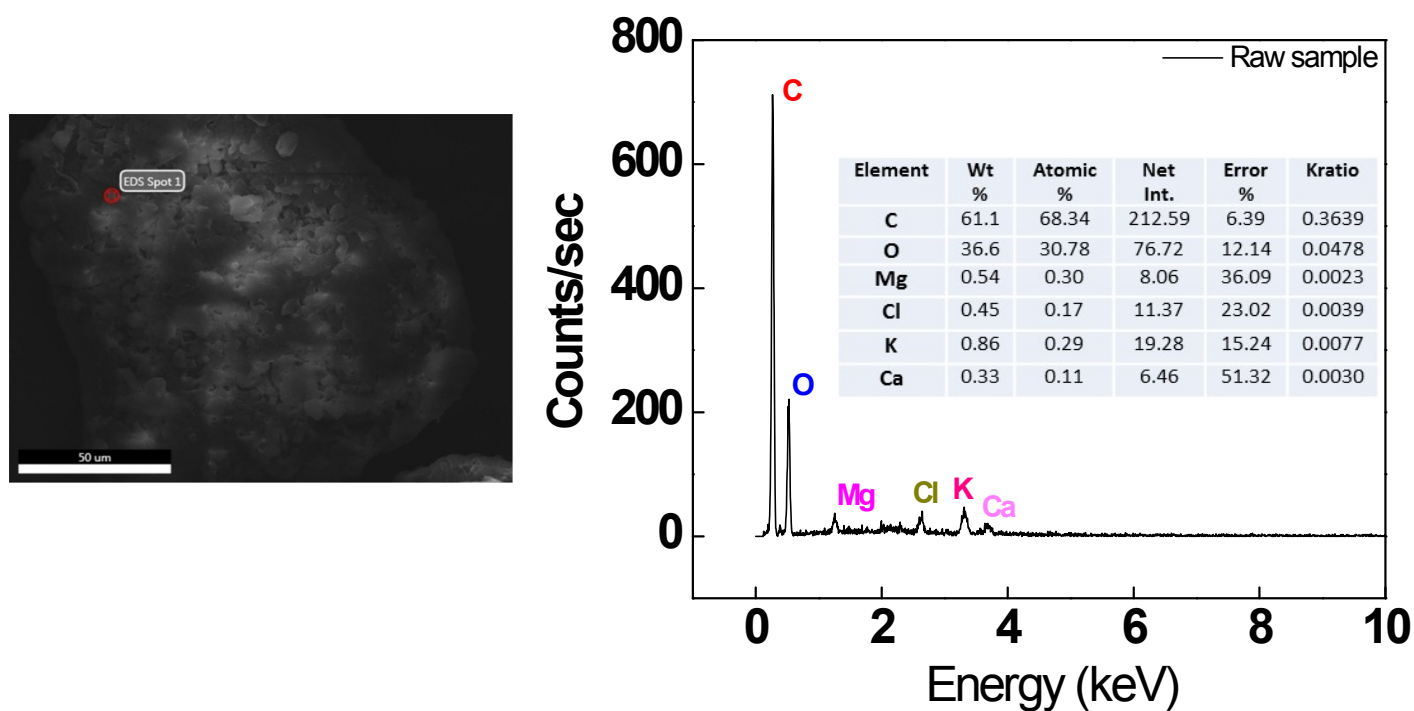

Figure S3: SEM image (a) and EDX spectrum (b) of raw Lablab Purpureus seeds before pyrolysis, (the inset shows the elemental composition).

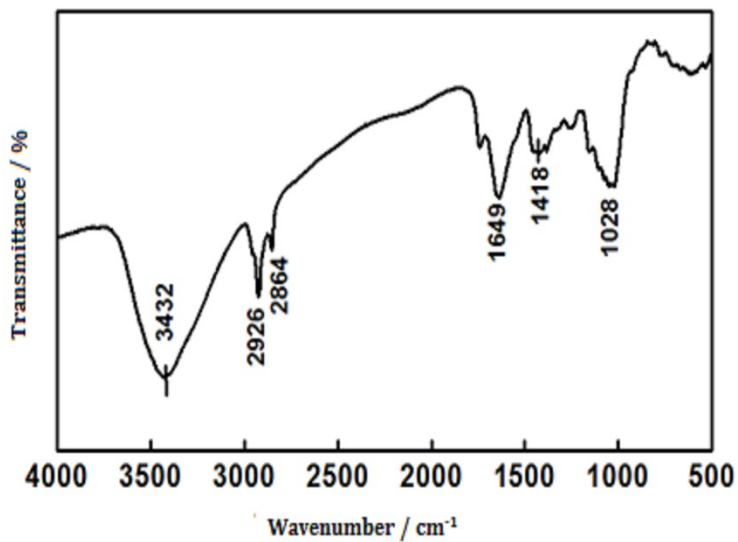

Figure S4: FTIR spectrum of raw Lablab Purpureus seeds before pyrolysis

Table S1 Elemental composition of the carbon nanospheres synthesized from Lablab Purpureus seeds at different temperatures (LP500, LP700 and LP800).

| Elements  | LP500      |            | LP700      |            | LP800      |            |
|-----------|------------|------------|------------|------------|------------|------------|
|           | Weight (%) | Atomic (%) | Weight (%) | Atomic (%) | Weight (%) | Atomic (%) |
| Carbon    | 74.37      | 82.32      | 74.51      | 83.21      | 79.53      | 85.33      |
| Oxygen    | 18.24      | 15.16      | 21.20      | 15.35      | 19.05      | 13.96      |
| Potassium | 7.39       | 2.51       | 4.30       | 1.44       | 1.42       | 0.71       |

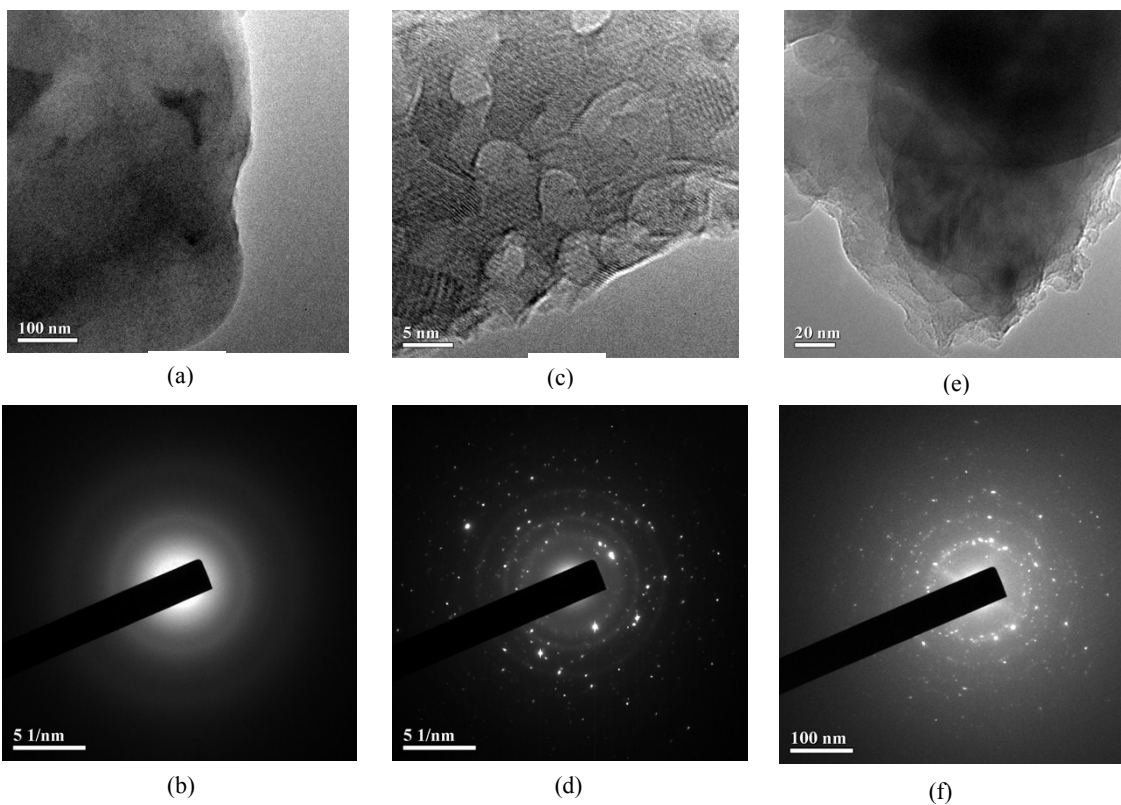

Figure S5 TEM and mounting images of LP500 (a, b), LP700 (c, d) and LP800 (e, f), respectively.

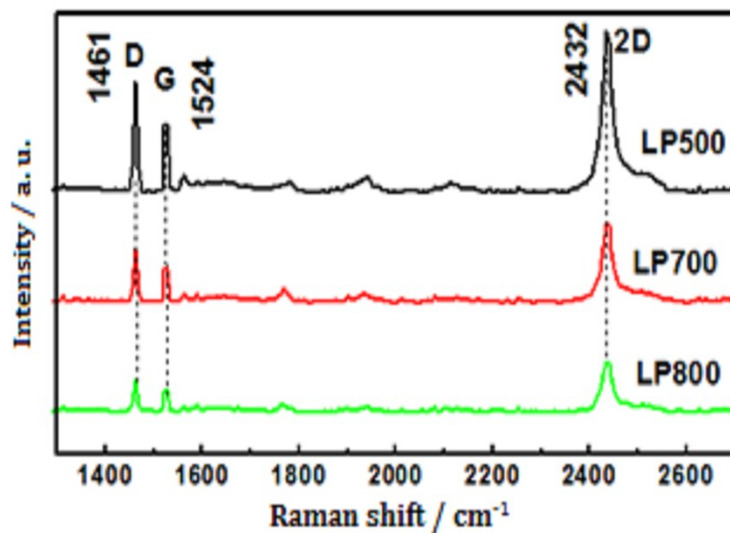

Figure S6: Raman spectra of the indicated materials.

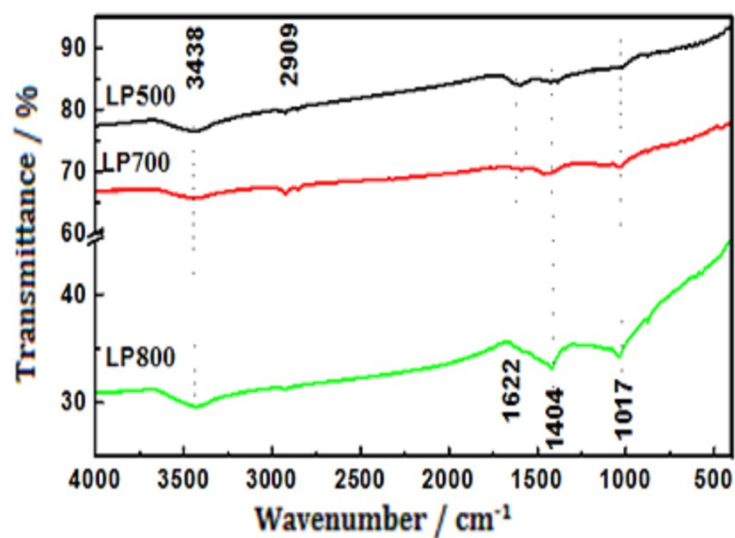

Figure S7: FTIR spectra of the indicated materials.

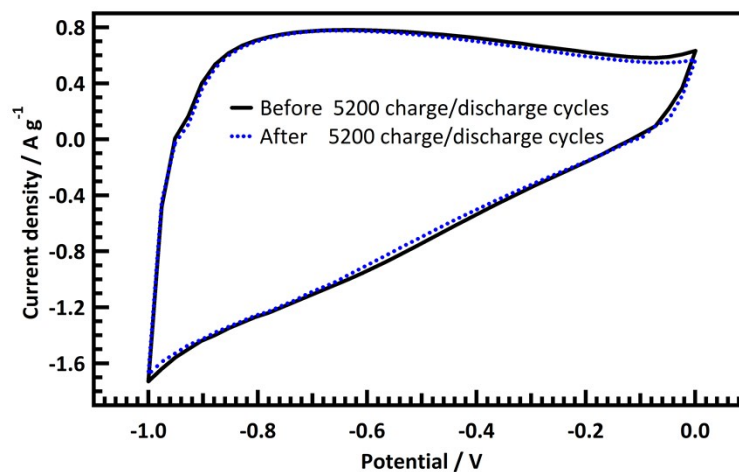

Figure S8: Cyclic voltammetry before and after 5200 charge/discharge cycles at  $3 \text{ A g}^{-1}$  of LP800.
